# Supplementary material
Source: publisher site journal article supplement (https://www.spandidos-publications.com/4183/downloadSupplementary)
Supplement: Supplementary file 1 [file downloadSupplementary]

## Sheet: Sheet1
				Table SII. Differentially expressed miRNAs following exposure to T. gondii.
miRNA	Sequence	Mouse_C937-02-S01_1_clean(norm)	Mouse_C937-02-S02_1_clean(norm)	Mouse_C937-02-S01_1_clean(reads)	Mouse_C937-02-S02_1_clean(reads)	fold(Mouse_C937-02-S01_1_clean/Mouse_C937-02-S02_1_clean)	pvalue(Mouse_C937-02-S01_1_clean/Mouse_C937-02-S02_1_clean)
mmu-let-7a-5p	TGAGGTAGTAGGTTGTATAGTT	11460.7	7357.39	155716	111606	1.55771	0
mmu-let-7b-3p	CTATACAACCTACTGCCTTCCC	26.4959	11.932	360	181	2.22057	1.67e-19
mmu-let-7b-5p	TGAGGTAGTAGGTTGTGTGGTT	3353.28	1735.55	45561	26327	1.93211	0
mmu-let-7c-2-3p	CTATACAATCTACTGTCTTTCC	173.548	112.86	2358	1712	1.53773	1.89e-42
mmu-let-7c-5p	TGAGGTAGTAGGTTGTATGGTT	11015.9	6418.91	149673	97370	1.71616	0
mmu-let-7d-3p	CTATACGACCTGCTGCCTTTCT	487.893	266.592	6629	4044	1.83011	1.78e-208
mmu-let-7d-5p	AGAGGTAGTAGGTTGCATAGTT	2191.58	1375.74	29777	20869	1.59301	0
mmu-let-7e-5p	TGAGGTAGGAGGTTGTATAGTT	716.347	464.229	9733	7042	1.54309	7.96e-172
mmu-let-7f-1-3p	CTATACAATCTATTGCCTTCCC	28.6303	13.3823	389	203	2.13941	1.65e-19
mmu-let-7f-2-3p	CTATACAGTCTACTGTCTTTC	37.2415	30.3245	506	460	1.2281	0.00141181
mmu-let-7f-5p	TGAGGTAGTAGATTGTATAGTT	80672.2	63811.6	1096092	967974	1.26422	0
mmu-let-7g-3p	ACTGTACAGGCCACTGCCTTGC	2.42879	1.05477	33	16	2.30268	0.00492075
mmu-let-7i-5p	TGAGGTAGTAGTTTGTGCTGTT	92989.2	81602	1263443	1237841	1.13954	0
mmu-let-7k	TGAGGTAGGAGGTTGTGTG	0.515199	0.0659229	7	1		0.0259322
mmu-miR-100-5p	AACCCGTAGATCCGAACTTGTG	2685.22	1392.36	36484	21121	1.92854	0
mmu-miR-101a-3p	TACAGTACTGTGATAACTGAA	5163.39	5042.51	70155	76491	1.02397	5.86e-06
mmu-miR-101b-3p	GTACAGTACTGTGATAGCT	156.473	184.584	2126	2800	0.847707	8.4e-09
mmu-miR-103-3p	AGCAGCATTGTACAGGGCTATGA	3532.05	2757.62	47990	41831	1.28083	1.23e-300
mmu-miR-106b-3p	CCGCACTGTGGGTACTTGCTGC	1176.35	928.392	15983	14083	1.26708	1.8e-93
mmu-miR-107-3p	AGCAGCATTGTACAGGGCTATCA	74.7774	34.0821	1016	517	2.19404	7.64e-51
mmu-miR-10a-5p	TACCCTGTAGATCCGAATTTGTG	17017.9	16202.6	231222	245781	1.05032	2.25e-64
mmu-miR-10b-5p	TACCCTGTAGAACCGAATTTGTG	887.908	488.62	12064	7412	1.81717	0
mmu-miR-1191a	CAGTCTTACTATGTAGCCCTA	37.0207	43.6409	503	662	0.848302	0.00532423
mmu-miR-1198-5p	TATGTGTTCCTGGCTGGCTTGG	299.404	275.755	4068	4183	1.08576	0.000187061
mmu-miR-122-5p	TGGAGTGTGACAATGGTGTTTG	1.6192	4.35091	22	66	0.372151	2.09e-05
mmu-miR-1249-3p	ACGCCCTTCCCCCCCTTCTTCA	19.8719	11.2069	270	170	1.77319	2.94e-09
mmu-miR-125a-5p	TCCCTGAGACCCTTTAACCTGTGA	949.511	300.608	12901	4560	3.15863	0
mmu-miR-125b-1-3p	ACGGGTTAGGCTCTTGGGAGCT	44.7487	37.1805	608	564	1.20355	0.00151821
mmu-miR-125b-2-3p	ACAAGTCAGGTTCTTGGGACCT	22.6687	10.8114	308	164	2.09675	3.74e-15
mmu-miR-125b-5p	TCCCTGAGACCCTAACTTGTGA	1852.95	886.135	25176	13442	2.09104	0
mmu-miR-126a-3p	TCGTACCGTGAGTAATAATGCG	12186.4	7930.26	165577	120296	1.5367	0
mmu-miR-126a-5p	CATTATTACTTTTGGTACGCG	735.336	607.941	9991	9222	1.20955	1.12e-39
mmu-miR-127-3p	TCGGATCCGTCTGAGCTTGGCT	551.925	484.995	7499	7357	1.138	3.35e-15
mmu-miR-128-3p	TCACAGTGAACCGGTCTCTTT	433.944	263.889	5896	4003	1.64442	4.23e-133
mmu-miR-129-5p	CTTTTTGCGGTCTGGGCTTGC	12.9536	6.9219	176	105	1.87139	2.33e-07
mmu-miR-1291	ATGGCTCTTACTGAAGACTAGCAGTT	5.66719	1.58215	77	24	3.58195	3.22e-09
mmu-miR-1306-5p	CACCACCTCCCCTGCAAACGTCC	10.2304	6.79006	139	103	1.50667	0.00151852
mmu-miR-130a-3p	CAGTGCAATGTTAAAAGGGCAT	84.787	58.2099	1152	883	1.45657	2.84e-17
mmu-miR-130a-5p	GCTCTTTTCACATTGTGCTACT	4.63679	2.63692	63	40	1.75841	0.00474283
mmu-miR-130b-3p	CAGTGCAATGATGAAAGGGCAT	36.3583	26.0395	494	395	1.39627	6.91e-07
mmu-miR-130b-5p	ACTCTTTCCCTGTTGCACTACT	123.942	104.224	1684	1581	1.18919	7.43e-07
mmu-miR-132-5p	AACCGTGGCTTTCGATTGTTAC	5.37279	8.50405	73	129	0.631791	0.00149852
mmu-miR-133a-3p	TTTGGTCCCCTTCAACCAGCTG	39.9647	28.1491	543	427	1.41975	5.27e-08
mmu-miR-135a-2-3p	TGTAGGGATGGAAGCCATGAA	0.294399	0	4	0		0.0470963
mmu-miR-135a-5p	TATGGCTTTTTATTCCTATGTGA	3.97439	1.05477	54	16	3.76803	3.79e-07
mmu-miR-135b-5p	TATGGCTTTTCATTCCTATGTGA	0.1472	0.725152	2	11	0.202991	0.0223626
mmu-miR-136-5p	ACTCCATTTGTTTTGATGATGG	7.13918	5.20791	97	79	1.37083	0.0369043
mmu-miR-138-1-3p	CGGCTACTTCACAACACCAGGG	0.883198	0.0659229	12	1	13.3974	0.0009192
mmu-miR-138-5p	AGCTGGTGTTGTGAATCAGGCCG	30.2495	5.66937	411	86	5.33561	3.48e-60
mmu-miR-139-3p	TGGAGACGCGGCCCTGTTGGAG	32.6783	24.3255	444	369	1.34337	2.65e-05
mmu-miR-139-5p	TCTACAGTGCACGTGTCTCCAG	1185.62	1006.58	16109	15269	1.17787	1.26e-47
mmu-miR-140-3p	TACCACAGGGTAGAACCACGG	3609.04	4066.52	49036	61686	0.887501	5.98e-87
mmu-miR-140-5p	CAGTGGTTTTACCCTATGGTAG	360.713	218.468	4901	3314	1.6511	1.56e-112
mmu-miR-141-3p	TAACACTGTCTGGTAAAGATGG	15.1616	9.2292	206	140	1.64278	4.71e-06
mmu-miR-142a-3p	TGTAGTGTTTCCTACTTTATGGA	6107.75	4846.12	82986	73512	1.26034	0
mmu-miR-142a-5p	CATAAAGTAGAAAGCACTACT	7398.33	5298.09	100521	80368	1.39641	0
mmu-miR-143-3p	TGAGATGAAGCACTGTAGCTC	150034	101140	2038509	1534218	1.48343	0
mmu-miR-143-5p	GGTGCAGTGCTGCATCTCTGG	193.273	123.935	2626	1880	1.55947	9.55e-50
mmu-miR-144-3p	TACAGTATAGATGATGTACT	201.001	182.475	2731	2768	1.10153	0.000337289
mmu-miR-144-5p	GGATATCATCATATACTGTAAGT	422.316	276.019	5738	4187	1.53002	1.26e-98
mmu-miR-145a-3p	ATTCCTGGAAATACTGTTCTTG	961.14	467.459	13059	7091	2.05609	0
mmu-miR-145a-5p	GTCCAGTTTTCCCAGGAATCCCT	6845.44	2894.48	93009	43907	2.365	0
mmu-miR-146a-3p	CCTGTGAAATTCAGTTCTTCAG	0.809598	1.77992	11	27	0.454851	0.0241965
mmu-miR-146a-5p	TGAGAACTGAATTCCATGGGTT	15134.3	12016.2	205630	182277	1.25949	0
mmu-miR-146b-3p	GCCCTAGGGACTCAGTTCTGGT	19.7247	31.3134	268	475	0.629915	7.85e-10
mmu-miR-146b-5p	TGAGAACTGAATTCCATAGGCT	3575.92	4318.81	48586	65513	0.827988	7.35e-220
mmu-miR-147-3p	GTGTGCGGAAATGCTTCTGCTA	10.9664	43.6409	149	662	0.251286	2.51e-66
mmu-miR-147-5p	TGGAAACATTTCTGCACAAACTAG	7.13918	15.5578	97	236	0.458881	1.68e-11
mmu-miR-148a-3p	TCAGTGCACTACAGAACTTTGT	199814	213592	2714874	3240022	0.935497	0
mmu-miR-148b-3p	TCAGTGCATCACAGAACTTTGT	4709.58	4833.79	63989	73325	0.974302	1.48e-06
mmu-miR-149-5p	TCTGGCTCCGTGTCTTCACTCCC	117.024	88.6663	1590	1345	1.31982	6.03e-14
mmu-miR-150-3p	CTGGTACAGGCCTGGGGGATAG	67.123	27.6217	912	419	2.43008	2.87e-55
mmu-miR-150-5p	TCTCCCAACCCTTGTACCAGTG	9310.15	5444.83	126497	82594	1.70991	0
mmu-miR-151-3p	CTAGACTGAGGCTCCTTGAGG	1214.4	805.38	16500	12217	1.50786	6e-263
mmu-miR-151-5p	TCGAGGAGCTCACAGTCTAGT	62.339	44.5639	847	676	1.39887	6.42e-11
mmu-miR-152-3p	TCAGTGCATGACAGAACTTGG	1457.57	1141.06	19804	17309	1.27738	9.16e-123
mmu-miR-152-5p	TAGGTTCTGTGATACACTCCGACT	31.7951	22.0182	432	334	1.44404	4.03e-07
mmu-miR-155-3p	CTCCTACCTGTTAGCATTAAC	4.41599	2.3073	60	35	1.91392	0.00191875
mmu-miR-155-5p	TTAATGCTAATTGTGATAGGGGT	1175.39	769.979	15970	11680	1.52652	2.62e-268
mmu-miR-15b-3p	CGAATCATTATTTGCTGCTCTA	136.528	124.001	1855	1881	1.10102	0.00327211
mmu-miR-15b-5p	TAGCAGCACATCATGGTTTACA	887.098	582.956	12053	8843	1.52172	2.4e-200
mmu-miR-16-1-3p	CCAGTATTGACTGTGCTGCTGA	339.59	372.003	4614	5643	0.912868	4.26e-06
mmu-miR-16-5p	TAGCAGCACGTAAATATTGGCG	3124.02	2393.92	42446	36314	1.30498	1.05e-304
mmu-miR-17-5p	CAAAGTGCTTACAGTGCAGGTAG	1293.59	1088.98	17576	16519	1.18789	7.06e-57
mmu-miR-181a-1-3p	ACCATCGACCGTTGATTGTACC	122.617	95.0608	1666	1442	1.28988	1.35e-12
mmu-miR-181a-5p	AACATTCAACGCTGTCGGTGAGT	1561.64	933.995	21218	14168	1.672	0
mmu-miR-181b-5p	AACATTCATTGCTGTCGGTGGGT	310.886	232.642	4224	3529	1.33633	3.3e-37
mmu-miR-181c-3p	ACCATCGACCGTTGAGTGGACC	31.1327	22.0182	423	334	1.41395	2.02e-06
mmu-miR-181c-5p	AACATTCAACCTGTCGGTGAGT	17.0752	10.284	232	156	1.66037	7.45e-07
mmu-miR-181d-5p	AACATTCATTGTTGTCGGTGGGT	237.139	143.25	3222	2173	1.65541	2.67e-75
mmu-miR-182-5p	TTTGGCAATGGTAGAACTCACACCG	231.471	97.8955	3145	1485	2.36448	3.67e-177
mmu-miR-183-5p	TATGGCACTGGTAGAATTCACT	91.9262	39.29	1249	596	2.33968	3.62e-70
mmu-miR-1839-3p	AGACCTACTTATCTACCAACAGC	27.9679	16.6785	380	253	1.67689	1.16e-10
mmu-miR-1839-5p	AAGGTAGATAGAACAGGTCTTG	1184.37	1010.8	16092	15333	1.17172	8.4e-45
mmu-miR-184-3p	TGGACGGAGAACTGATAAGGGT	42.3935	29.6653	576	450	1.42906	1.2e-08
mmu-miR-1843a-3p	TCTGATCGTTCACCTCCATACA	18.9152	11.3387	257	172	1.66819	1.51e-07
mmu-miR-1843a-5p	TATGGAGGTCTCTGTCTGACT	178.995	132.505	2432	2010	1.35085	1.45e-23
mmu-miR-1843b-3p	CCGATCGTTCCCCTCCATAC	33.7823	28.0172	459	425	1.20577	0.00540929
mmu-miR-1843b-5p	ATGGAGGTCTCTGTCTGACTT	319.202	213.986	4337	3246	1.4917	2.35e-67
mmu-miR-185-3p	AGGGGCTGGCTTTCCTCTGGT	14.6464	8.6359	199	131	1.69599	2.03e-06
mmu-miR-185-5p	TGGAGAGAAAGGCAGTTCCTGA	727.093	486.049	9879	7373	1.49592	7.17e-153
mmu-miR-186-5p	CAAAGAATTCTCCTTTTGGGCT	577.685	437.135	7849	6631	1.32153	5.42e-63
mmu-miR-187-3p	TCGTGTCTTGTGTTGCAGCCGG	64.9886	32.3681	883	491	2.0078	8.1e-37
mmu-miR-191-5p	CAACGGAATCCCAAAAGCAGCTG	9435.27	5823.82	128197	88343	1.62012	0
mmu-miR-192-5p	CTGACCTATGAATTGACAGCC	750.056	816.916	10191	12392	0.918155	1.63e-10
mmu-miR-193b-3p	AACTGGCCCACAAAGTCCCGCT	6.62398	4.41683	90	67	1.49971	0.0115849
mmu-miR-194-5p	TGTAACAGCAACTCCATGTGGA	237.286	189.001	3224	2867	1.25547	7.11e-19
mmu-miR-1941-3p	CATCTTAGCAGTATCTCCCAT	2.57599	0.92292	35	14	2.79113	0.000680537
mmu-miR-1941-5p	AGGGAGATGCTGGTACAGAGGCTT	1.104	0.329614	15	5	3.34936	0.0135793
mmu-miR-1947-5p	AGGACGAGCTAGCTGAGTGCTG	6.84478	12.3276	93	187	0.555241	2.07e-06
mmu-miR-1948-5p	ATATGAGTATTCTGCCTAAAT	0.294399	1.58215	4	24	0.186076	0.000321648
mmu-miR-1950	TCTGCATCTAAGGATATGGTCA	0.1472	1.05477	2	16	0.139557	0.00163811
mmu-miR-1953	TGGGAAAGTTCTCAGGCTTCTG	0.0735998	0.527383	1	8		0.0332257
mmu-miR-195a-3p	CCAATATTGGCTGTGCTGCTCC	84.787	50.431	1152	765	1.68125	1.79e-29
mmu-miR-195a-5p	TAGCAGCACAGAAATATTGGC	311.842	148.392	4237	2251	2.10147	3.38e-188
mmu-miR-1964-3p	CCGACTTCTGGGCTCCGGCTTT	101.789	112.135	1383	1701	0.907734	0.00745665
mmu-miR-196a-1-3p	CAACGACATCAAACCACCTGAT	2.94399	1.18661	40	18	2.48101	0.000915627
mmu-miR-196a-5p	TAGGTAGTTTCATGTTGTTGGG	7.87518	5.40568	107	82	1.45684	0.0100272
mmu-miR-1981-5p	GTAAAGGCTGGGCTTAGACGTGGC	240.009	209.635	3261	3180	1.14489	5.66e-08
mmu-miR-1983	CTCACCTGGAGCATGTTTTCT	22.5215	26.501	306	402	0.849838	0.0318001
mmu-miR-199a-5p	CCCAGTGTTCAGACTACCTGTTC	2293.74	1893.83	31165	28728	1.21116	1.84e-121
mmu-miR-199b-3p	ACAGTAGTCTGCACATTGGTTA	4269.16	3459.17	58005	52473	1.23416	1.3e-267
mmu-miR-199b-5p	CCCAGTGTTTAGACTACCTGTTC	124.384	90.1166	1690	1367	1.38025	6.1e-19
mmu-miR-19a-3p	TGTGCAAATCTATGCAAAACTGA	230.883	166.587	3137	2527	1.38596	1.58e-34
mmu-miR-19b-3p	TGTGCAAATCCATGCAAAACTGA	548.687	459.482	7455	6970	1.19414	1.7e-26
mmu-miR-1a-3p	TGGAATGTAAAGAAGTATGTAT	920.807	724.822	12511	10995	1.27039	4.48e-75
mmu-miR-200a-3p	TAACACTGTCTGGTAACGATGT	200.044	136.988	2718	2078	1.46031	5.23e-39
mmu-miR-200a-5p	CATCTTACCGGACAGTGCTGGA	14.352	5.73529	195	87	2.5024	1.19e-13
mmu-miR-200b-3p	TAATACTGCCTGGTAATGATGA	218.739	118.595	2972	1799	1.84441	1.33e-96
mmu-miR-200b-5p	CATCTTACTGGGCAGCATTGGA	1.0304	0.329614	14	5	3.12607	0.0223036
mmu-miR-200c-3p	TAATACTGCCGGGTAATGATGGA	165.379	92.6216	2247	1405	1.78553	3.91e-67
mmu-miR-200c-5p	CGTCTTACCCAGCAGTGTTTGG	0.294399	0	4	0		0.0470963
mmu-miR-201-5p	TACTCAGTAAGGCATTGTTCTT	1.98719	0.659229	27	10	3.01442	0.00170542
mmu-miR-203-3p	GTGAAATGTTTAGGACCACTAG	341.209	394.746	4636	5988	0.864375	8.08e-14
mmu-miR-204-5p	TTCCCTTTGTCATCCTATGCCT	43.4239	18.5243	590	281	2.34415	3.54e-34
mmu-miR-206-3p	TGGAATGTAAGGAAGTGTGTGG	173.769	158.083	2361	2398	1.09923	0.00110311
mmu-miR-20a-3p	ACTGCATTACGAGCACTTAAAG	3.09119	1.64807	42	25	1.87564	0.0116096
mmu-miR-20a-5p	TAAAGTGCTTATAGTGCAGGTAG	2304.04	2266.3	31305	34378	1.01666	0.0344874
mmu-miR-20b-5p	CAAAGTGCTCATAGTGCAGGTAG	117.392	103.301	1595	1567	1.1364	0.000324315
mmu-miR-210-3p	CTGTGCGTGTGACAGCGGCTGA	36.7999	60.715	500	921	0.606109	3.95e-20
mmu-miR-210-5p	AGCCACTGCCCACCGCACACTG	0.662398	3.1643	9	48	0.209335	7.61e-07
mmu-miR-211-5p	TTCCCTTTGTCATCCTTTGCCT	9.78877	2.17545	133	33	4.49964	3.53e-18
mmu-miR-212-3p	TAACAGTCTCCAGTCACGGCCA	3.75359	7.05375	51	107	0.532141	0.000144761
mmu-miR-212-5p	ACCTTGGCTCTAGACTGCTTACT	5.74079	7.91075	78	120	0.725695	0.0268854
mmu-miR-214-3p	ACAGCAGGCACAGACAGGCAGT	230.294	213.92	3129	3245	1.07654	0.00324657
mmu-miR-214-5p	TGCCTGTCTACACTTGCTGTGC	51.1519	40.2789	695	611	1.26994	1.59e-05
mmu-miR-215-5p	ATGACCTATGATTTGACAGAC	4.19519	5.86714	57	89	0.715032	0.047371
mmu-miR-216a-3p	CACAGTGGTCTCTGGGATTATG	5.37279	0	73	0	49	1.61e-24
mmu-miR-216a-5p	TAATCTCAGCTGGCAACTGTGA	17.3696	0.0659229	236	1	263.483	1.71e-75
mmu-miR-216b-3p	ACACTTACCTGTAGAGATTCTT	16.8544	0	229	0	49	2.58e-75
mmu-miR-216b-5p	AAATCTCTGCAGGCAAATGTGA	30.3967	0.197769	413	3	153.698	5.59e-129
mmu-miR-217-3p	CATCAGTTCCTAATGCATTGCCT	0.735998	0	10	0	49	0.000524004
mmu-miR-217-5p	TACTGCATCAGGAACTGACTGGA	245.087	0.46146	3330	7	531.113	0
mmu-miR-218-5p	TTGTGCTTGATCTAACCATGT	106.941	86.9523	1453	1319	1.22988	5.18e-08
mmu-miR-219a-1-3p	AGAGTTGCGTCTGGACGTCCCG	7.43358	10.5477	101	160	0.704761	0.00556896
mmu-miR-21a-3p	CAACAGCAGTCGATGGGCTGTC	10.672	37.1805	145	564	0.287031	8.95e-50
mmu-miR-21a-5p	TAGCTTATCAGACTGATGTTGA	98552.2	249978	1339028	3791983	0.394243	0
mmu-miR-22-3p	AAGCTGCCAGTTGAAGAACTGT	701.038	528.108	9525	8011	1.32745	2.81e-78
mmu-miR-22-5p	AGTTCTTCAGTGGCAAGCTTTA	48.5023	32.8296	659	498	1.47739	3.82e-11
mmu-miR-221-3p	AGCTACATTGTCTGCTGGGTTTC	526.533	488.752	7154	7414	1.0773	7.07e-06
mmu-miR-221-5p	ACCTGGCATACAATGTAGATTTCTGT	119.232	140.152	1620	2126	0.850731	8.87e-07
mmu-miR-223-3p	TGTCAGTTTGTCAAATACCCCA	1132.33	2006.56	15385	30438	0.564315	0
mmu-miR-223-5p	CGTGTATTTGACAAGCTGAGTTG	271.657	353.149	3691	5357	0.769242	5.21e-35
mmu-miR-224-5p	TAAGTCACTAGTGGTTCCGTT	120.336	88.3367	1635	1340	1.36224	3.93e-17
mmu-miR-23a-3p	ATCACATTGCCAGGGATTTCC	2808.79	1471.4	38163	22320	1.90892	0
mmu-miR-23b-3p	ATCACATTGCCAGGGATTACC	1039.82	542.677	14128	8232	1.91609	0
mmu-miR-24-1-5p	GTGCCTACTGAGCTGATATCAGT	12.4384	8.76774	169	133	1.41865	0.00245605
mmu-miR-24-2-5p	GTGCCTACTGAGCTGAAACAGT	285.567	198.032	3880	3004	1.44202	9.21e-52
mmu-miR-24-3p	TGGCTCAGTTCAGCAGGAACAG	2995.81	1855.47	40704	28146	1.61459	0
mmu-miR-25-3p	CATTGCACTTGTCTCGGTCTGA	7414.59	6539.42	100742	99198	1.13383	1.94e-173
mmu-miR-25-5p	AGGCGGAGACTTGGGCAATTGC	16.928	11.7343	230	178	1.44261	0.000226354
mmu-miR-26a-2-3p	CCTGTTCTTGATTACTTGTTTC	17.3696	9.09736	236	138	1.9093	7.69e-10
mmu-miR-26a-5p	TTCAAGTAATCCAGGATAGGCT	37511.5	16462.8	509669	249728	2.27857	0
mmu-miR-26b-3p	CCTGTTCTCCATTACTTGGCTC	12.2912	7.58113	167	115	1.62128	5.72e-05
mmu-miR-26b-5p	TTCAAGTAATTCAGGATAGGT	7121.81	4174.24	96764	63320	1.70614	0
mmu-miR-27a-3p	TTCACAGTGGCTAAGTTCCGC	1974.61	1568.44	26829	23792	1.25897	8.39e-148
mmu-miR-27b-3p	TTCACAGTGGCTAAGTTCTGC	15122.3	14184.2	205467	215163	1.06614	1.07e-95
mmu-miR-27b-5p	AGAGCTTAGCTGATTGGTGAAC	24.7295	15.6237	336	237	1.58282	4.77e-08
mmu-miR-28a-3p	CACTAGATTGTGAGCTGCTGGA	291.823	267.054	3965	4051	1.09275	7.2e-05
mmu-miR-292a-3p	AAAGTGCCGCCAGGTTTTGAGTGT	0.588798	0.0659229	8	1		0.0134908
mmu-miR-293-3p	AGTGCCGCAGAGTTTGTAGTGT	0.367999	0	5	0		0.0222525
mmu-miR-293-5p	ACTCAAACTGTGTGACATTTTG	0.294399	0	4	0		0.0470963
mmu-miR-296-5p	AGGGCCCCCCCTCAATCCTGT	17.1488	13.9097	233	211	1.23286	0.0274412
mmu-miR-297a-5p	ATGTATGTGTGCATGTGCATGT	1.6192	2.96653	22	45	0.545822	0.018141
mmu-miR-297b-5p	ATGTATGTGTGCATGAACATGT	1.5456	2.70284	21	41	0.571842	0.0353933
mmu-miR-297c-3p	TATACATACACACATACCCATA	21.5647	15.426	293	234	1.39795	0.000125494
mmu-miR-29a-3p	TAGCACCATCTGAAATCGGTTA	5921.18	3511.05	80451	53260	1.68644	0
mmu-miR-29b-3p	TAGCACCATTTGAAATCAGTGTT	359.903	295.203	4890	4478	1.21917	9.03e-22
mmu-miR-29c-3p	TAGCACCATTTGAAATCGGTTA	42.7615	28.215	581	428	1.51556	4.98e-11
mmu-miR-29c-5p	TGACCGATTTCTCCTGGTGTTC	11.408	5.20791	155	79	2.19051	5.23e-09
mmu-miR-3064-3p	TGCCACACTGCAACACCTTACA	1.3984	0.527383	19	8	2.65158	0.0168024
mmu-miR-3068-3p	GGTGAATTGCAGTACTCCAACA	90.1598	79.3052	1225	1203	1.13687	0.00157447
mmu-miR-3068-5p	TTGGAGTTCATGCAAGTTCTAACC	111.136	87.4797	1510	1327	1.27042	1.89e-10
mmu-miR-3074-5p	GTTCCTGCTGAACTGAGCCAGT	19.2831	12.3276	262	187	1.56423	2.48e-06
mmu-miR-3095-3p	TGGACACTGGAGAGAGAGCTTTT	0.956798	0.329614	13	5	2.90278	0.0361522
mmu-miR-30a-3p	CTTTCAGTCGGATGTTTGCAGC	428.498	240.618	5822	3650	1.78082	1.44e-169
mmu-miR-30a-5p	TGTAAACATCCTCGACTGGAAG	5866.64	3727.61	79710	56545	1.57383	0
mmu-miR-30b-3p	CTGGGATGTGGATGTTTACGTC	61.8238	47.2667	840	717	1.30798	1.22e-07
mmu-miR-30b-5p	TGTAAACATCCTACACTCAGCT	2046.88	1513.26	27811	22955	1.35263	5.9e-253
mmu-miR-30c-1-3p	CTGGGAGAGGGTTGTTTACTCC	31.4271	18.4584	427	280	1.70259	2.45e-12
mmu-miR-30c-2-3p	CTGGGAGAAGGCTGTTTACTCT	106.278	50.8265	1444	771	2.091	1.06e-64
mmu-miR-30c-5p	TGTAAACATCCTACACTCTCAGC	6891.89	3775.47	93640	57271	1.82544	0
mmu-miR-30d-5p	TGTAAACATCCCCGACTGGAAG	13788.7	8504.05	187347	129000	1.62143	0
mmu-miR-30e-3p	CTTTCAGTCGGATGTTTACAGC	1386.47	914.284	18838	13869	1.51646	2.36e-307
mmu-miR-30e-5p	TGTAAACATCCTTGACTGGAAG	805.918	636.156	10950	9650	1.26686	1.53e-64
mmu-miR-31-5p	AGGCAAGATGCTGGCATAGCTG	15.456	7.38336	210	112	2.09335	9.25e-11
mmu-miR-3102-3p	GAGCACCCCATTGGCTACCCACA	3.09119	1.38438	42	21	2.23291	0.00203703
mmu-miR-32-5p	TATTGCACATTACTAAGTTGCA	245.087	232.114	3330	3521	1.05589	0.0244602
mmu-miR-320-3p	AAAAGCTGGGTTGAGAGGGCGA	290.278	229.346	3944	3479	1.26568	3.56e-24
mmu-miR-322-3p	AAACATGAAGCGCTGCAACAC	240.009	198.164	3261	3006	1.21116	3.42e-14
mmu-miR-322-5p	CAGCAGCAATTCATGTTTTGGA	133.142	109.696	1809	1664	1.21374	1.15e-08
mmu-miR-324-5p	CGCATCCCCTAGGGCATTGGTGT	27.9679	16.0193	380	243	1.74589	6.07e-12
mmu-miR-326-3p	CCTCTGGGCCCTTCCTCCAGT	188.342	73.8336	2559	1120	2.5509	1.3e-164
mmu-miR-328-3p	CTGGCCCTCTCTGCCCTTCCGT	645.838	460.471	8775	6985	1.40256	1.38e-99
mmu-miR-329-5p	AGAGGTTTTCTGGGTCTCTGTT	5.44639	3.03245	74	46	1.79603	0.00157708
mmu-miR-33-3p	CAATGTTTCCACAGTGCATCAC	6.25598	4.35091	85	66	1.43786	0.026299
mmu-miR-330-3p	GCAAAGCACAGGGCCTGCAGAGA	9.71517	5.80121	132	88	1.67468	0.000153039
mmu-miR-331-3p	GCCCCTGGGCCTATCCTAGAA	22.3007	13.9097	303	211	1.60325	1.08e-07
mmu-miR-335-3p	TTTTTCATTATTGCTCCTGACC	69.2574	57.6166	941	874	1.20204	8.88e-05
mmu-miR-335-5p	TCAAGAGCAATAACGAAAAATGT	22.5215	14.1734	306	215	1.589	1.53e-07
mmu-miR-338-3p	TCCAGCATCAGTGATTTTGTTG	7.13918	5.01014	97	76	1.42495	0.0203359
mmu-miR-339-3p	TGAGCGCCTCGGCGACAGAGCCG	42.6879	29.5334	580	448	1.44541	3.96e-09
mmu-miR-339-5p	TCCCTGTCCTCCAGGAGCTCACG	177.817	129.143	2416	1959	1.3769	4.78e-26
mmu-miR-340-5p	TTATAAAGCAATGAGACTGATT	3444.47	4647.89	46800	70505	0.741082	0
mmu-miR-342-3p	TCTCACACAGAAATCGCACCCGT	1376.17	998.006	18698	15139	1.37892	3.85e-191
mmu-miR-342-5p	AGGGGTGCTATCTGTGATTGAG	14.2048	7.97667	193	121	1.78079	4.45e-07
mmu-miR-344-3p	TGATCTAGCCAAAGCCTGACTGT	10.7456	6.19675	146	94	1.73407	2.5e-05
mmu-miR-345-3p	CCTGAACTAGGGGTCTGGAGAC	60.499	49.0466	822	744	1.2335	3.31e-05
mmu-miR-345-5p	GCTGACCCCTAGTCCAGTGCTT	22.9631	18.0629	312	274	1.27129	0.00369183
mmu-miR-3470b	TCACTCTGTAGACCAGGCTGG	7.35998	11.2069	100	170	0.656737	0.000740873
mmu-miR-34b-3p	AATCACTAACTCCACTGCCATC	2.87039	1.05477	39	16	2.72135	0.000426176
mmu-miR-34c-3p	AATCACTAACCACACAGCCAGG	1.84	0.659229	25	10	2.79113	0.00422733
mmu-miR-350-3p	TTCACAAAGCCCATACACTTTC	105.101	69.2849	1428	1051	1.51693	5.5e-25
mmu-miR-351-5p	TCCCTGAGGAGCCCTTTGAGCCTG	254.14	137.647	3453	2088	1.84632	3.07e-112
mmu-miR-3535	TGGATATGATGACTGATTACCTGAGA	800.104	486.643	10871	7382	1.64413	1.58e-243
mmu-miR-3569-3p	TCAGTCTGCGCTCCTCTCCAGC	0.588798	0.0659229	8	1		0.0134908
mmu-miR-361-3p	TCCCCCAGGTGTGATTCTGATTTGT	1242.51	1161.63	16882	17621	1.06963	4.14e-10
mmu-miR-361-5p	TTATCAGAATCTCCAGGGGTAC	202.767	127.363	2755	1932	1.59204	2.46e-56
mmu-miR-363-3p	AATTGCACGGTATCCATCTGTA	68.7422	88.7322	934	1346	0.774716	1.65e-09
mmu-miR-365-3p	TAATGCCCCTAAAAATCCTTAT	35.9167	16.9422	488	257	2.11996	1.23e-23
mmu-miR-369-3p	AATAATACATGGTTGATCTTT	1.3984	3.49391	19	53	0.400238	0.00032978
mmu-miR-374b-5p	ATATAATACAACCTGCTAAGTG	2447.93	1690.79	33260	25648	1.4478	0
mmu-miR-375-3p	TTTGTTCGTTCGGCTCGCGTGA	175.756	8.50405	2388	129	20.6674	0
mmu-miR-376b-5p	GTGGATATTCCTTCTATGGTTA	2.06079	1.05477	28	16	1.95379	0.0303162
mmu-miR-378a-3p	ACTGGACTTGGAGTCAGAAGG	5700.45	7497.01	77452	113724	0.760363	0
mmu-miR-378b	CTGGACTTGGAGTCAGAAGA	184.22	267.581	2503	4059	0.688466	5.68e-50
mmu-miR-378c	ACTGGACTTGGAGTCAGAAGC	34.2239	67.8346	465	1029	0.50452	8.77e-37
mmu-miR-379-5p	TGGTAGACTATGGAACGTAGG	114.227	125.188	1552	1899	0.912446	0.00737096
mmu-miR-381-3p	TATACAAGGGCAAGCTCTCTGT	53.6543	65.3296	729	991	0.821286	5.15e-05
mmu-miR-382-3p	TCATTCACGGACAACACTTTTT	17.5168	12.855	238	195	1.36265	0.00131473
mmu-miR-383-5p	AGATCAGAAGGTGACTGTGGCT	4.93119	1.84584	67	28	2.67151	4.89e-06
mmu-miR-384-5p	TGTAAACAATTCCTAGGCAATGT	0.294399	0	4	0		0.0470963
mmu-miR-3962	AGGTAGTAGTTTGTACATTT	1847.43	1587.42	25101	24080	1.16379	1.85e-63
mmu-miR-3965	TGCTTATCAGCCTGATGTT	1.6928	0.593306	23	9	2.85316	0.0053711
mmu-miR-3970	GAGGTTGTAGTTTGTGCTTT	0	0.593306	0	9		0.00333694
mmu-miR-409-3p	GAATGTTGCTCGGTGAACCCCT	9.86237	12.9209	134	196	0.763289	0.0155931
mmu-miR-411-3p	TATGTAACACGGTCCACTAACC	4.71039	3.03245	64	46	1.55333	0.021931
mmu-miR-411-5p	TAGTAGACCGTATAGCGTACG	32.0159	24.0618	435	365	1.33057	5.5e-05
mmu-miR-421-3p	ATCAACAGACATTAATTGGGCGC	49.9743	33.1592	679	503	1.5071	2.25e-12
mmu-miR-421-5p	CTCATTAAATGTTTGTTGAAT	0.294399	0	4	0		0.0470963
mmu-miR-423-3p	AGCTCGGTCTGAGGCCCCTCAGT	1436.96	1236.71	19524	18760	1.16192	8.7e-49
mmu-miR-423-5p	TGAGGGGCAGAGAGCGAGACTTT	909.473	773.078	12357	11727	1.17643	1.96e-36
mmu-miR-425-5p	AATGACACGATCACTCCCGTTGA	298.079	264.219	4050	4008	1.12815	6.25e-08
mmu-miR-429-3p	TAATACTGTCTGGTAATGCCGT	13.7632	4.94422	187	75	2.78369	2.85e-15
mmu-miR-434-3p	TTTGAACCATCACTCGACTCCT	27.6735	12.4594	376	189	2.22109	2.61e-20
mmu-miR-434-5p	GCTCGACTCATGGTTTGAACCA	77.1326	61.9016	1048	939	1.24605	9.55e-07
mmu-miR-450a-5p	TTTTGCGATGTGTTCCTAATAT	81.107	96.9066	1102	1470	0.83696	7.45e-06
mmu-miR-450b-5p	TTTTGCAGTATGTTCCTGAATA	38.4191	69.219	522	1050	0.555037	1.6e-29
mmu-miR-451a	AAACCGTTACCATTACTGAGTT	7333.71	13460.9	99643	204192	0.544814	0
mmu-miR-455-3p	GCAGTCCACGGGCATATACAC	93.1038	35.928	1265	545	2.5914	1.96e-84
mmu-miR-455-5p	TATGTGCCTTTGGACTACATCG	525.355	285.644	7138	4333	1.8392	1.97e-227
mmu-miR-466c-5p	TGATGTGTGTGTGCATGTACATAT	10.2304	14.9645	139	227	0.683643	0.00036292
mmu-miR-466d-3p	TATACATACACGCACACATAG	33.9295	20.6339	461	313	1.64436	6.78e-12
mmu-miR-466f-3p	CATACACACACACATACACAC	0.294399	0	4	0		0.0470963
mmu-miR-466h-3p	TACGCACGCACACACACAC	0.588798	1.4503	8	22	0.405983	0.0244337
mmu-miR-466k	TGTGTGTGTACATGTACATGTGA	3.82719	5.73529	52	87	0.667305	0.0201525
mmu-miR-466m-3p	TACATACACACATACACACGCA	1.3248	0.395537	18	6	3.34936	0.0066382
mmu-miR-466o-5p	TGATGTGTGTGTACATGTACAT	0.441599	1.58215	6	24	0.279113	0.00246005
mmu-miR-467a-5p	TAAGTGCCTGCATGTATATGCG	236.476	341.678	3213	5183	0.692102	9.45e-62
mmu-miR-467b-5p	GTAAGTGCCTGCATGTATATG	1.104	2.83468	15	43	0.38946	0.000970351
mmu-miR-467d-3p	ATATACATACACACACCTACAC	19.9455	13.9097	271	211	1.43393	8.04e-05
mmu-miR-467e-5p	ATAAGTGTGAGCATGTATATGT	55.1999	47.3985	750	719	1.16459	0.00349786
mmu-miR-484	TCAGGCTCAGTCCCCTCCCGAT	382.645	340.426	5199	5164	1.12402	2.68e-09
mmu-miR-485-5p	AGAGGCTGGCCGTGATGAATTC	0.441599	1.38438	6	21	0.318987	0.00891504
mmu-miR-486a-3p	CGGGGCAGCTCAGTACAGGAT	36.2847	17.8651	493	271	2.03104	8.13e-22
mmu-miR-486b-5p	TCCTGTACTGAGCTGCCCCGAG	8530.07	5237.7	115898	79452	1.62859	0
mmu-miR-490-3p	CAACCTGGAGGACTCCATGCTG	4.34239	1.58215	59	24	2.74461	1.22e-05
mmu-miR-491-5p	AGTGGGGAACCCTTCCATGAGG	1.472	0.659229	20	10	2.23291	0.0345269
mmu-miR-495-3p	AAACAAACATGGTGCACTTCTT	4.12159	6.19675	56	94	0.665121	0.0149331
mmu-miR-497a-5p	CAGCAGCACACTGTGGTTTGTA	52.5503	26.501	714	402	1.98295	2.97e-29
mmu-miR-499-5p	TTAAGACTTGCAGTGATGTTT	27.9679	21.9523	380	333	1.27403	0.00123291
mmu-miR-500-3p	AATGCACCTGGGCAAGGGTTCA	15.088	11.6024	205	176	1.30041	0.0104387
mmu-miR-501-3p	AATGCACCCGGGCAAGGATTTG	125.929	103.235	1711	1566	1.21983	1.3e-08
mmu-miR-501-5p	AATCCTTTGTCCCTGGGTGAAA	1.98719	0.92292	27	14	2.15316	0.0175531
mmu-miR-503-3p	GAGTATTGTTTCCACTGCCTGG	22.9631	12.3276	312	187	1.86275	7.6e-12
mmu-miR-503-5p	TAGCAGCGGGAACAGTACTGCAG	52.6975	90.578	716	1374	0.581791	2.82e-33
mmu-miR-504-5p	AGACCCTGGTCTGCACTCTATC	9.05278	4.21906	123	64	2.14568	3.61e-07
mmu-miR-5099	TTAGATCGATGTGGTGCTCC	758.961	492.312	10312	7468	1.54163	3.19e-181
mmu-miR-5100	TCGAATCCCAGCGGTGCCTCT	0.662398	1.58215	9	24	0.41867	0.021839
mmu-miR-5103	TCATCCGGGATCCCCTGAGG	0.367999	1.38438	5	21	0.265822	0.00381251
mmu-miR-5104	CTGTGCTAGTGAGGTGGCTCAGCA	7.58078	5.4716	103	83	1.38548	0.0266271
mmu-miR-5107-3p	CAACCTGTGCTTCTCTTCCCAG	8.02238	4.0213	109	61	1.99497	1.03e-05
mmu-miR-5107-5p	TGGGCAGAGGAGGCAGGGACA	7.13918	2.3073	97	35	3.09417	1.04e-09
mmu-miR-511-3p	AATGTGTAGCAAAAGACAGGAT	22.1535	15.2282	301	231	1.45477	1.66e-05
mmu-miR-511-5p	ATGCCTTTTGCTCTGCACTCA	7.43358	4.15314	101	63	1.78987	0.00023685
mmu-miR-5113	ACAGAGGAGGAGAGAGATCCTGT	6.03518	3.7576	82	57	1.60613	0.00562675
mmu-miR-5120	TTTGGGGCTGTGGTGCCACCAGC	3.53279	1.64807	48	25	2.14359	0.00155122
mmu-miR-5121	AGCTTGTGATGAGACATCTCC	2.13439	1.12069	29	17	1.90454	0.0327811
mmu-miR-5129-3p	AATGTGCCTGTGCATCTCTTCC	10.1568	6.19675	138	94	1.63905	0.000191628
mmu-miR-532-5p	CATGCCTTGAGTGTAGGACCGT	1784.94	1873.07	24252	28413	0.952952	3.48e-08
mmu-miR-541-5p	AAGGGATTCTGATGTTGGTCACACT	75.1454	67.8346	1021	1029	1.10777	0.0204832
mmu-miR-542-3p	TGTGACAGATTGATAACTGAAA	76.691	130.395	1042	1978	0.588142	1.35e-45
mmu-miR-542-5p	CTCGGGGATCATCATGTCACGA	1.3984	0.593306	19	9	2.35696	0.030237
mmu-miR-547-3p	CTTGGTACATCTTTGAGTGAG	12.3648	4.28499	168	65	2.8856	1.61e-14
mmu-miR-5615-5p	CTTGGTTGTTTTCTGAGACAGA	0.735998	1.64807	10	25	0.446581	0.0274367
mmu-miR-574-3p	CACGCTCATGCACACACCCACA	50.3423	23.8641	684	362	2.10954	3.81e-32
mmu-miR-582-3p	TAACCTGTTGAACAACTGAAC	55.1263	166.587	749	2527	0.330915	4.22e-183
mmu-miR-582-5p	ATACAGTTGTTCAACCAGTTAC	6.40318	10.0203	87	152	0.639023	0.000743462
mmu-miR-598-3p	TACGTCATCGTCGTCATCGTTA	14.0576	9.75659	191	148	1.44083	0.000808491
mmu-miR-6236	GCCGTCGCCGGCAGTCAGG	0	0.395537	0	6		0.0227328
mmu-miR-652-3p	AATGGCGCCACTAGGGTTGTG	1097.96	934.918	14918	14182	1.17439	8.99e-43
mmu-miR-652-5p	CAACCCTAGGAGGGGGTGCCATTC	6.91838	11.4047	94	173	0.606628	7.31e-05
mmu-miR-6537-3p	TTATCAGGTGGAAGAACTCAGCT	1.84	3.23022	25	49	0.569619	0.0203931
mmu-miR-6540-5p	CTAAGGCAGGCAGACTTCAGTG	0	0.329614	0	5		0.0430944
mmu-miR-664-3p	TATTCATTTACTCCCCAGCCTA	21.0495	10.7454	286	163	1.95893	2.61e-12
mmu-miR-664-5p	CTGGCTGGGGAAAATGACTGG	14.6464	9.95435	199	151	1.47135	0.000322082
mmu-miR-667-3p	TGACACCTGCCACCCAGCCCAAG	0.956798	0.329614	13	5	2.90278	0.0361522
mmu-miR-668-3p	TGTCACTCGGCTCGGCCCACTACC	1.104	0.131846	15	2	8.3734	0.000583461
mmu-miR-669b-5p	AGTTTTGTGTGCATGTGCATGT	3.75359	6.26267	51	95	0.599359	0.00276965
mmu-miR-669d-5p	ACTTGTGTGTGCATGTATATGT	5.96158	8.89959	81	135	0.669872	0.00401768
mmu-miR-669e-5p	TGTCTTGTGTGTGCATGTTCAT	3.31199	5.60344	45	85	0.591063	0.00379058
mmu-miR-669h-5p	ATGCATGGGTGTATAGTTGAGTGC	1.3248	0.593306	18	9	2.23291	0.0452362
mmu-miR-669o-3p	ACATAACATACACACACACGTAT	84.5662	59.9898	1149	910	1.40968	7.88e-15
mmu-miR-669p-5p	AGTTGTGTGTGCATGTTCATGTCT	71.6126	103.763	973	1574	0.690158	3.63e-20
mmu-miR-674-3p	CACAGCTCCCATCTCAGAACAA	77.2062	67.3073	1049	1021	1.14707	0.00179891
mmu-miR-676-3p	CCGTCCTGAGGTTGTTGAGCT	39.5231	14.8326	537	225	2.6646	1.96e-38
mmu-miR-676-5p	ACTCTACAACCTTAGGACTTGC	22.5951	13.3164	307	202	1.69679	3.5e-09
mmu-miR-690	AAAGGCTAGGCTCACAACCAAA	4.63679	7.18559	63	109	0.645289	0.00516336
mmu-miR-6902-3p	CCATGTGATGTGTGGGTTCAG	0	0.329614	0	5		0.0430944
mmu-miR-6911-3p	TCAATCACACTCTGTCCACAG	3.97439	1.71399	54	26	2.31879	0.000280175
mmu-miR-6922-5p	TGTGGGAGGGGACTGTAGAGAGG	0.294399	0	4	0		0.0470963
mmu-miR-6943-3p	CTGCTTCCATACCCCTACCCAG	1.9136	0.725152	26	11	2.63889	0.00512938
mmu-miR-6954-3p	TGCAGCCAGCTCTTCCCCTAG	1.6192	0.791075	22	12	2.04683	0.0429534
mmu-miR-6964-3p	TTTCTTGTCTTCCACTCTAG	1.6192	0.593306	22	9	2.72911	0.00840683
mmu-miR-6969-3p	TGTTGTTCCCATCTCTGCAG	7.94878	0	108	0	49	6.45e-36
mmu-miR-6973a-3p	CACTCTAACCCTACCTACCCAT	0.294399	0	4	0		0.0470963
mmu-miR-700-3p	CACGCGGGAACCGAGTCCACC	18.1792	6.46044	247	98	2.81392	5.61e-20
mmu-miR-700-5p	TAAGGCTCCTTCCTGTGCTTGC	13.1008	7.64705	178	116	1.71318	4.97e-06
mmu-miR-7015-3p	TCTCACTGTCCTCTGCACTAG	16.0448	12.6572	218	192	1.26764	0.0164124
mmu-miR-702-5p	GTGAGTGGGGTGGTTGGCATG	0.0735998	0.593306	1	9		0.0191036
mmu-miR-7021-3p	TCTCTGTGCTTCTGCTCCTTAG	0.441599	0	6	0		0.010514
mmu-miR-704	AGACATGTGCTCTGCTCCTAG	7.80158	15.6237	106	237	0.499342	8.04e-10
mmu-miR-7042-3p	TGTCCCTTTGTTTTCTCTCAG	0.515199	0	7	0		0.00496776
mmu-miR-7043-3p	ACTGTGCCTCTCTGTTTTCAG	22.1535	34.4117	301	522	0.643779	6.57e-10
mmu-miR-7053-3p	CTCCTGTGTCTCCTTCCCCAG	0	0.395537	0	6		0.0227328
mmu-miR-7054-3p	TCCAACTTGGCCCCTTCCAG	0.588798	0.131846	8	2		0.0428828
mmu-miR-7057-3p	TAATTTGATGTCTTTCTCCACC	0.662398	0.0659229	9	1		0.00695929
mmu-miR-7068-3p	TCACCCTGGACTGACTCTCAG	1.9136	3.23022	26	49	0.592404	0.0293403
mmu-miR-7075-3p	CAACCATGTCTTCTTTCCCAG	6.25598	3.23022	85	49	1.9367	0.000174609
mmu-miR-708-3p	CAACTAGACTGTGAGCTTCTAG	168.912	92.3579	2295	1401	1.82888	2.58e-73
mmu-miR-708-5p	AAGGAGCTTACAATCTAGCTGGG	45.5583	16.283	619	247	2.79791	2.93e-47
mmu-miR-7219-3p	TATCCGGGTTTCTAACACACT	4.12159	2.04361	56	31	2.01682	0.00139339
mmu-miR-7226-3p	TGACACAGCCATTCTCTGAGCAG	0.588798	0.0659229	8	1		0.0134908
mmu-miR-744-3p	CTGTTGCCACTAACCTCAACCT	4.12159	2.04361	56	31	2.01682	0.00139339
mmu-miR-744-5p	TGCGGGGCTAGGGCTAACAGCA	367.263	201.79	4990	3061	1.82003	5.04e-155
mmu-miR-7649-5p	TGACAGCAGTGCTGTAGACATG	0.809598	1.91176	11	29	0.423482	0.0122305
mmu-miR-7658-3p	ACCACCTTCCTCACCCACGCT	0.441599	0	6	0		0.010514
mmu-miR-7670-3p	TTCCCTTTCTGAATATCTGTAGA	0.662398	2.50507	9	38	0.264423	7.62e-05
mmu-miR-7672-3p	TCGGCTGCCAGGTTCATGTGG	0	0.329614	0	5		0.0430944
mmu-miR-7673-5p	TTTGACTGAGAGGTAAGGAATG	0.220799	1.05477	3	16	0.209335	0.00551487
mmu-miR-7676-3p	TCCGGTGCTCACTCTGCCCACA	4.78399	9.88843	65	150	0.483796	4.14e-07
mmu-miR-7678-3p	TTTCCTTACTTTCTCTTGTAGC	0.515199	1.58215	7	24	0.325632	0.00560383
mmu-miR-7a-1-3p	CAACAAATCACAGTCTGCCATA	64.3262	38.6308	874	586	1.66515	4.5e-22
mmu-miR-7a-5p	TGGAAGACTAGTGATTTTGTTGT	16121	20982	219036	318281	0.768326	0
mmu-miR-802-3p	ACGGAGAGTCTTTGTCACTCAG	0.294399	0	4	0		0.0470963
mmu-miR-802-5p	TCAGTAACAAAGATTCATCCTT	11.2608	0.0659229	153	1	170.817	1.18e-48
mmu-miR-8096	GGGCACGGTAGCTGAAGAGT	0.441599	0.0659229	6	1		0.0493379
mmu-miR-8097	AACAAGGAAAATGTCCGGGCTG	0.809598	1.97769	11	30	0.409366	0.00859725
mmu-miR-8103	TCTCCTGTTCTCTGTTCTCCC	1.3984	2.83468	19	43	0.493317	0.00865101
mmu-miR-872-3p	TGAACTATTGCAGTAGCCTCCT	18.9152	14.7667	257	224	1.28093	0.00667003
mmu-miR-872-5p	AAGGTTACTTGTTAGTTCAGG	160.006	130.395	2174	1978	1.22708	4.37e-11
mmu-miR-873a-3p	GAGACTGACAAGTTCCCGGGA	0.441599	0.0659229	6	1		0.0493379
mmu-miR-874-3p	CTGCCCTGGCCCGAGGGACCGA	1.9136	0.791075	26	12	2.41898	0.00919327
mmu-miR-877-3p	TGTCCTCTTCTCCCTCCTCCCA	3.45919	9.42697	47	143	0.366946	2e-10
mmu-miR-881-3p	AACTGTGTCTTTTCTGAATAGA	1.0304	0.131846	14	2	7.81517	0.00110482
mmu-miR-9-5p	TCTTTGGTTATCTAGCTGTATGA	30.7647	22.4797	418	341	1.36856	1.61e-05
mmu-miR-92a-1-5p	AGGTTGGGATTTGTCGCAATGCT	5.81438	2.83468	79	43	2.05116	0.000106202
mmu-miR-92a-3p	TATTGCACTTGTCCCGGCCTG	7587.04	6022.05	103085	91350	1.25987	0
mmu-miR-92b-3p	TATTGCACTCGTCCCGGCCTCC	9.12638	6.19675	124	94	1.47277	0.00444576
mmu-miR-93-3p	ACTGCTGAGCTAGCACTTCCCG	16.7808	9.55882	228	145	1.75553	7.83e-08
mmu-miR-93-5p	CAAAGTGCTGTTCGTGCAGGTAG	1893.06	1409.69	25721	21384	1.34289	6.44e-224
mmu-miR-935	CCCAGTTACCGCTTCCGCTACCGC	1.472	0.329614	20	5	4.46581	0.000967395
mmu-miR-96-5p	TTTGGCACTAGCACATTTTTGCT	23.9935	11.3387	326	172	2.11607	3.04e-16
mmu-miR-98-3p	CTATACAACTTACTACTTTCCT	18.8416	11.6683	256	177	1.61476	7.52e-07
mmu-miR-98-5p	TGAGGTAGTAAGTTGTATTGTT	611.394	557.246	8307	8453	1.09717	1.96e-09
mmu-miR-99a-5p	AACCCGTAGATCCGATCTTGTG	4848.46	2244.21	65876	34043	2.16043	0
mmu-miR-99b-3p	CAAGCTCGTGTCTGTGGGTCCG	71.4654	58.4736	971	887	1.22218	1.54e-05
mmu-miR-99b-5p	CACCCGTAGAACCGACCTTGCG	2687.79	1796.99	36519	27259	1.49572	0
